# Supplementary material for: Egg White Hydrolysate as a functional food ingredient to prevent cognitive dysfunction in rats following long-term exposure to aluminum
Source: PubMed Central journal article supplement (PMC6372713; doi:10.1038/s41598-018-38226-7), 2019-02-12

## **Supplementary Information**

### **Egg White Hydrolysate as a functional food ingredient to prevent cognitive dysfunction in rats following long-term exposure to aluminum**

Caroline Silveira Martinez<sup>a\*\*</sup>, Caroline D. C. Alterman<sup>a</sup>, Gema Vera<sup>b</sup>, Antonio Márquez Gallego<sup>b</sup>, José Antonio Uranga Ocio<sup>b</sup>, Franck Maciel Peçanha<sup>a</sup>, Dalton Valentim Vassallo<sup>c</sup>, Christopher Exley<sup>d</sup>, Pâmela B. Mello-Carpes<sup>a</sup>, Marta Miguel<sup>e\*</sup>, Giulia Alessandra Wiggers<sup>a</sup>

### Figure legend

**Fig S1.** Effect of EWH on the presence of aluminum in hippocampus. Autofluorescence (green) (A), lumogallion fluorescence (orange) for Al in control (B) and EWH-treated animals (C) showing no specific orange fluorescence. DAPI-staining (blue), (A'), (B') & (C'); autofluorescence or lumogallion & DAPI overlay (A''), (B'') & (C''). Scale bars: 50  $\mu\text{m}$  (objective X20).

Figure SI

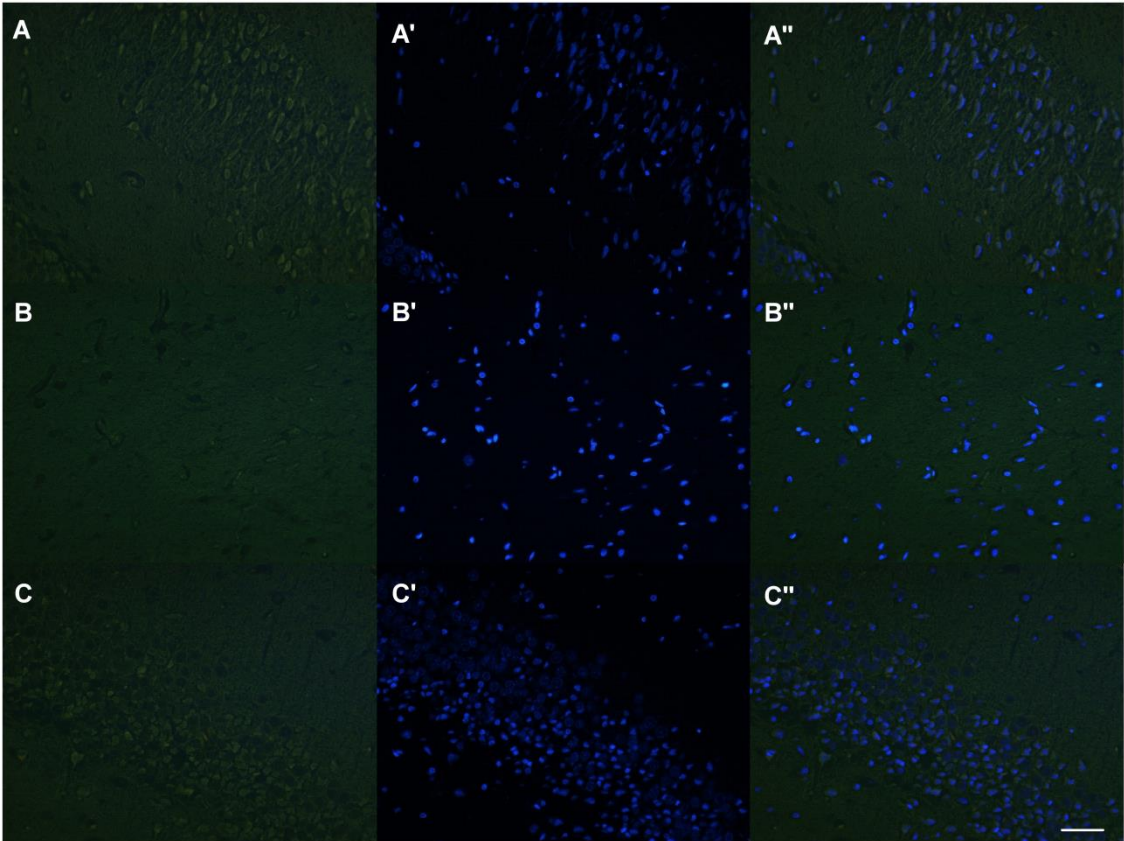

Supplement: 41598_2018_38226_MOESM1_ESM.pdf [file 41598_2018_38226_MOESM1_ESM.pdf]
